# Supplementary material for: Fabrication of PES-based membranes with a high and stable desalination performance for membrane distillation
Source: Royal Society of Chemistry journal article supplement (doi:10.1039/c6ra22193a), 2016-01-01
Supplement: c6ra22193a1.pdf [file c6ra22193a1.pdf]

## Supplemental Material

### Fabrication of PES-based membranes with high and stable desalination performance for membrane distillation

Lixia Liu<sup>a,b</sup>, Fei Shen<sup>\*a,b</sup>, Bowu Zhang<sup>c</sup>, Haiqing Jiang<sup>c</sup>, Jingye Li<sup>c</sup>, Jianquan Luo<sup>a,b</sup>,  
Huanhuan Wu<sup>a,b</sup>, Rashid Khan<sup>a,b</sup>, Yinhua Wan<sup>\*a,b</sup>

<sup>a</sup> State Key Laboratory of Biochemical Engineering, Institute of Process Engineering, Chinese Academy of Sciences, Beijing 100190, China.

<sup>b</sup> University of Chinese Academy of Sciences, Beijing 100049, China

<sup>c</sup> Shanghai Institute of Applied Physics, Chinese Academy of Sciences, Shanghai 201800, China.

E-mail: [fshen@ipe.ac.cn](mailto:fshen@ipe.ac.cn), [yhwan@ipe.ac.cn](mailto:yhwan@ipe.ac.cn). Tel: +86-10-82544991.

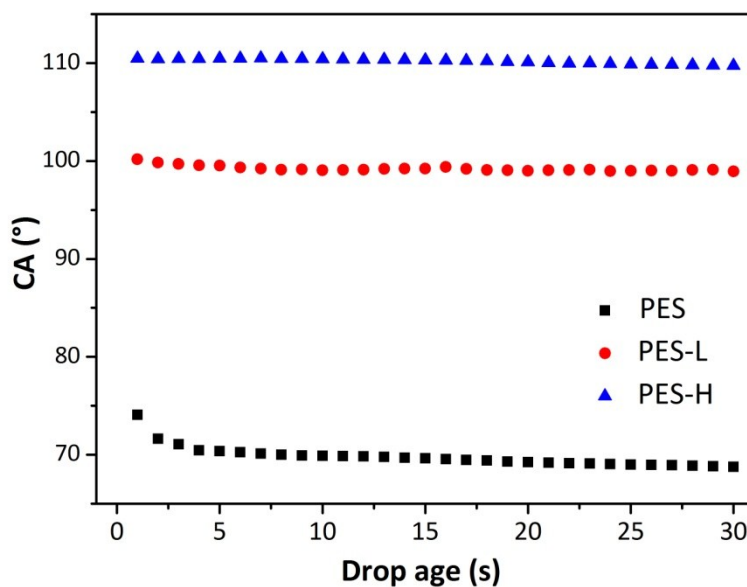

**Fig. S1** Static CA evolution of PES, PES-L and PES-H membranes versus drop age.

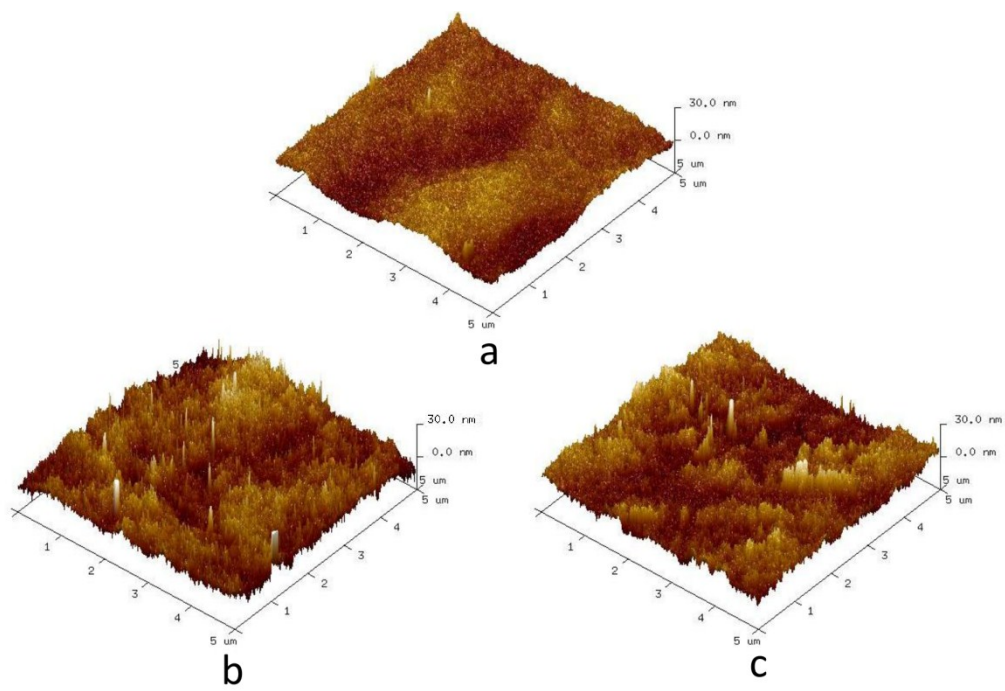

**Fig. S2** AFM 3D images of membranes: (a) PES, (b) PES-L and (c) PES-H.
